# Supplementary material for: First example of a Cu(i)–(η2-O,O)nitrite complex derived from Cu(ii)–nitrosyl
Source: Royal Society of Chemistry journal article supplement (doi:10.1039/c1cc16316g), 2011-11-17
Supplement: c1cc16316g.pdf [file c1cc16316g.pdf]

## Supporting Information

For

### First example of Cu(I)-( $\eta^2$ -O,O)nitrite complex derived from Cu(II)-nitrosyl

Apurba Kalita, Pankaj Kumar, Ramesh C. Deka and Biplab Mondal\*

Department of Chemistry, Indian Institute of Technology Guwahati, Assam 781039, India

#### Table of Contents

| Sl. No. | Content                                                                                                                                                       | Page No. |
|---------|---------------------------------------------------------------------------------------------------------------------------------------------------------------|----------|
| 1       | Experimental Section                                                                                                                                          | 02       |
| 2       | <b>Figure S1:</b> ORTEP diagram of complex <b>1</b>                                                                                                           | 06       |
| 3       | <b>Figure S2:</b> ORTEP diagram of complex <b>3</b>                                                                                                           | 06       |
| 4       | <b>Figure S3:</b> FT-IR spectrum of L in KBr                                                                                                                  | 07       |
| 5       | <b>Figure S4:</b> $^1\text{H-NMR}$ spectrum of L in methanol- $d_4$                                                                                           | 07       |
| 6       | <b>Figure S5:</b> $^{13}\text{C-NMR}$ spectrum of L in methanol- $d_4$                                                                                        | 08       |
| 7       | <b>Figure S6:</b> ESI-mass spectrum of L in methanol                                                                                                          | 08       |
| 8       | <b>Figure S7:</b> FT-IR spectrum of complex <b>1</b> in KBr                                                                                                   | 09       |
| 9       | <b>Figure S8:</b> $^1\text{H-NMR}$ spectrum of complex <b>1</b> in $\text{CD}_3\text{CN}$                                                                     | 09       |
| 10      | <b>Figure S9:</b> ESI-Mass spectrum of complex <b>1</b> in methanol.                                                                                          | 10       |
| 11      | <b>Figure S10:</b> X-band EPR spectra of the complexes <b>1</b> (black) and <b>2</b> (red) in acetonitrile at 77 K                                            | 10       |
| 12      | <b>Figure S11:</b> UV-visible spectra of complexes <b>1</b> (red) and <b>2</b> (blue) in acetonitrile solvent at room temperature                             | 11       |
| 13      | <b>Figure S12:</b> UV-visible spectrum of complex <b>2</b> in acetonitrile solvent at room temperature                                                        | 11       |
| 14      | <b>Figure S13:</b> FT-IR spectrum of complex <b>2</b> in KBr                                                                                                  | 12       |
| 15      | <b>Figure S14:</b> FT-IR spectra of complex <b>2</b> derived from nitric oxide (black) and $^{15}\text{NO}$ (blue) in acetonitrile solution.                  | 12       |
| 16      | <b>Figure S15:</b> $^1\text{H-NMR}$ spectrum of complex <b>2</b> in methanol- $d_4$                                                                           | 13       |
| 17      | <b>Figure S16:</b> ESI-Mass spectrum of complex <b>2</b> in acetonitrile.                                                                                     | 13       |
| 18      | <b>Figure S17:</b> FT-IR spectrum of complex <b>3</b> in KBr                                                                                                  | 14       |
| 19      | <b>Figure S18:</b> UV-visible spectrum of complex <b>3</b> in acetonitrile solvent at room temperature                                                        | 14       |
| 20      | <b>Figure S19:</b> (a) UV-visible spectroscopic monitoring of the reaction of complex <b>2</b> with water in acetonitrile.                                    | 15       |
| 21      | <b>Figure S20:</b> Solution FT-IR spectra of complex <b>2</b> (red line) and after reaction with water in acetonitrile solvent at room temperature            | 15       |
| 22      | <b>Figure S21:</b> ESI-mass spectrum of complex <b>3</b> obtained from the reaction of complex <b>2</b> and water in acetonitrile                             | 16       |
| 23      | <b>Figure S22:</b> ESI-mass spectrum of complex <b>3</b> obtained from the reaction of complex <b>2</b> and water ( $^{18}\text{O}$ -labeled) in acetonitrile | 16       |
| 24      | <b>Figure S23:</b> $^1\text{H-NMR}$ spectrum of complex <b>3</b> in methanol- $d_4$                                                                           | 17       |
| 25      | <b>Table S1.</b> Crystallographic data for complex <b>1</b> and <b>3</b>                                                                                      | 17       |
| 26      | <b>Table S2.</b> Selected bond length (Å) for complex <b>1</b> and <b>3</b>                                                                                   | 18       |
| 27      | <b>Table S3.</b> Selected bond angles ( $^\circ$ ) for complex <b>1</b> and <b>3</b>                                                                          | 18       |

## Experimental Section

### General:

All reagents and solvents were purchased from commercial sources and were of reagent grade. Acetonitrile was distilled from calcium hydride. Deoxygenation of the solvent and solutions were effected by repeated vacuum/purge cycles or bubbling with nitrogen for 30 minutes. NO gas was purified by passing through KOH and P<sub>2</sub>O<sub>5</sub> column. UV-visible spectra were recorded on a Perkin Elmer Lambda 25 UV-visible spectrophotometer. FT-IR spectra were taken on a Perkin Elmer spectrophotometer with samples prepared either as KBr pellets or for solutions, in NaCl cell of one cm path length. Solution electrical conductivity was checked using a Systronic 305 conductivity bridge. <sup>1</sup>H-NMR spectra were obtained with a 400 MHz Varian FT spectrometer. Chemical shifts (ppm) were referenced either with an internal standard (Me<sub>4</sub>Si) for organic compounds or to the residual solvent peaks. The X-band Electron Paramagnetic Resonance (EPR) spectra of the complexes and of the reaction mixtures were recorded on a JES-FA200 ESR spectrometer. Elemental analyses were obtained from a Perkin Elmer Series II Analyzer. The magnetic moment of complexes are measured on a Cambridge Magnetic Balance. Single crystals were grown by slow diffusion followed by slow evaporation technique. The intensity data were collected using a Bruker SMART APEX-II CCD diffractometer, equipped with a fine focus 1.75 kW sealed tube MoK $\alpha$  radiation ( $\lambda = 0.71073 \text{ \AA}$ ) at 296(2)K with increasing  $\omega$  (width of  $0.3^\circ$  per frame) at a scan speed of 3 s/frame. The SMART software was used for data acquisition. Data integration and reduction were undertaken with SAINT and XPREP software. Structures were solved by direct methods using SHELXS-97 and refined with full-matrix least squares on  $F^2$  using SHELXL-97.

All non-hydrogen atoms were refined anisotropically. Structural illustrations have been drawn with ORTEP-3 for Windows.

DFT calculations were performed on complex **2**. The complex was fully optimized using PW91 functional and DNP basis sets in the presence of solvent acetonitrile. The Conductor-like Screening Model (COSMO) as incorporated into the DMol<sup>3</sup> program with dielectric constant of 37.5 was adopted to study the solvent effect.<sup>2,3</sup> The HOMO and LUMO energy values were also calculated in the presence of solvent and they are shown in S29 and S30, respectively. It has been observed that both HOMO and LUMO orbitals are localized on the imidazole ring of the ligand. NBO calculations were performed on the optimized cluster to identify the electronic distribution on the complex.

### **Synthesis of ligand, L**

The ligand **L** was synthesized by a method adapted from Morteza Shiri.<sup>1</sup>

A 100-ml, two-necked, round-bottomed flask equipped with a magnetic stirring bar, and a rubber septum was charged with 2.20g (20 mmol) of 2-ethyl-4-methyl-imidazole, and 30 mL of methanol. To the stirred solution 0.45g (15 mmol) of formaldehyde was added over a period of 5 min and the resulting mixture was made alkaline (pH ~14) by adding KOH. The reaction mixture was then allowed to stir. at room temperature . After 3-4 hr. Ligand **L**<sub>1</sub> comes out from the reaction mixture as white precipitate .The white precipitate was washed with water, dried in vacuum. Yield: 1.97 g (85%). It was characterized by elemental analysis, FT-IR, <sup>1</sup>H- NMR and <sup>13</sup>C-NMR spectroscopy. Elemental analyses: Calcd. (%) for C<sub>13</sub>H<sub>20</sub>N<sub>4</sub>: C, 67.21; H, 8.68; N, 24.12. Found (%): C, 67.19; H, 8.68; N, 24.02. FT-IR (in KBr): 2964, 2842, 1614, 1529, 1455, 1071 cm<sup>-1</sup>; <sup>1</sup>H-NMR (400 MHz,

$\text{CDCl}_3$ ):  $\delta_{\text{ppm}}$ , 3.53(2H), 2.44(4H), 1.87(6H), 1.08(6H).  $^{13}\text{C-NMR}$  (100 MHz,  $\text{CDCl}_3$ ):  
 $\delta_{\text{ppm}}$ , 149.17, 129.09, 127.15, 23.29, 22.55, 13.66, 10.64. Mass: (m+H<sup>+</sup>)/z: Calcd. 233.16;  
Found, 233.17.

### Synthesis of complex 1, $[\text{Cu}(\text{L})_2](\text{ClO}_4)_2$

Hexaaquacopper(II)perchlorate (0.740 g, 2 mmol) was dissolved in 20 ml distilled methanol. To this solution, 0.928 g (4 mmol) of the ligand **L** was added slowly with constant stirring. The color of the solution turned into dark brown from light blue. The stirring was continued for 1h at room temperature. The volume of the solution then reduced to ~5 ml. To this, 10 ml of diethylether was added to make a layer on it and kept it overnight on freezer. This resulted into microcrystalline complex **1**. Yield: 1.25 g (85%). Elemental Analyses: Calcd. for  $\text{C}_{26}\text{H}_{40}\text{Cl}_2\text{CuN}_8\text{O}_8$ : C, 42.95; H, 5.55; N, 15.41. Found (%): C, 42.91; H, 5.54; N, 15.36. FT-IR: 2976, 1633, 1455, 1150, 1114,  $625\text{cm}^{-1}$ ; magnetic moment, 1.60 BM. ESI-Mass: 527.24. CCDC No. 838636.

### Synthesis of complex 2, $[\text{Cu}(\text{L})_2(\text{NO})](\text{ClO}_4)_2$

To 20 ml of distilled and degassed acetonitrile solution of complex **1** (500 mg), freshly prepared nitric oxide was bubbled for 1 minute. The color of the solution turned dark green. The excess of nitric oxide was removed by vacuum and purging argon gas and 10 ml of degassed benzene was added to this under nitrogen atmosphere. The reaction mixture was kept in freezer for two days. This resulted into the precipitate of complex **2** as green powder. Yield: 0.364 g (70%). Elemental Analyses: Calcd. for

$C_{26}H_{40}Cl_2CuN_9O_9$ : C, 41.25; H, 5.32; N, 16.65. Found (%): C, 41.28; H, 5.30; N, 16.70.

FT-IR (in KBr): 2921, 1662, 1620, 1475, 1384, 1242, 1108, 625  $cm^{-1}$ . ESI-Mass: 557.46.

### **Synthesis of complex 3, [Cu (L)<sub>2</sub>(NO<sub>2</sub>)]**

To 15 ml of distilled and degassed acetonitrile solution of complex **2** (500 mg) quantitative amount of distilled water was added at room temperature with constant stirring under nitrogen environment. The green color of the solution turned colorless. It was kept on freezer. After three days, yellow color crystals of complex **3** were obtained. Yield: 0.265 g (63%). Elemental Analyses: Calcd. for  $C_{26}H_{40}CuN_9O_2$ : C, 54.38; H, 7.02; N, 21.95. Found (%): C, 54.36; H, 7.04; N, 21.91. FT-IR(in KBr): 2976, 1639, 1535, 1455, 1377, 1322, 1267, 1175, 967, 789  $cm^{-1}$ . ESI-Mass: 573.26 (when water used to prepare the complex) and 575.21 (when  $^{18}O$ -labeled water was used). CCDC No. 838637.

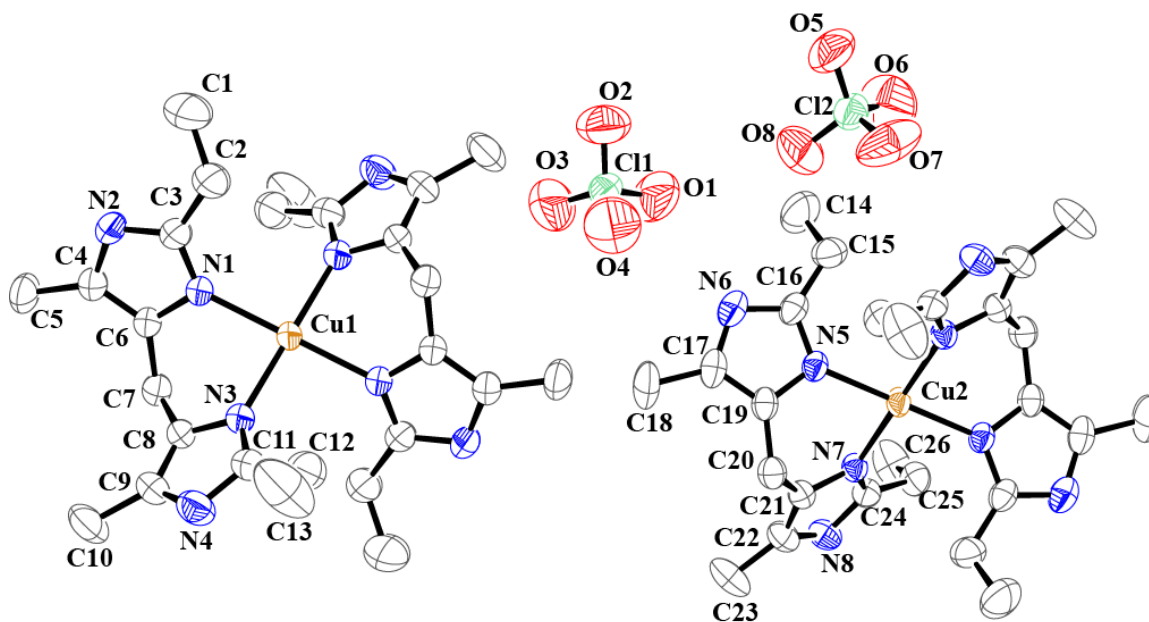

**Figure S1.** ORTEP diagram of complex **1** (50% thermal ellipsoid plot) (Hydrogen atoms and acetonitrile solvent are omitted for clarity).

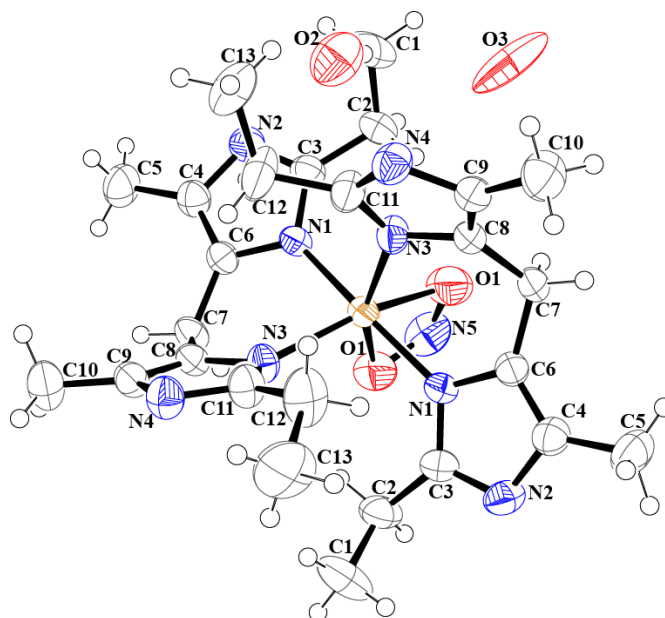

**Figure S2.** ORTEP diagram of complex **3** (50% thermal ellipsoid plot).

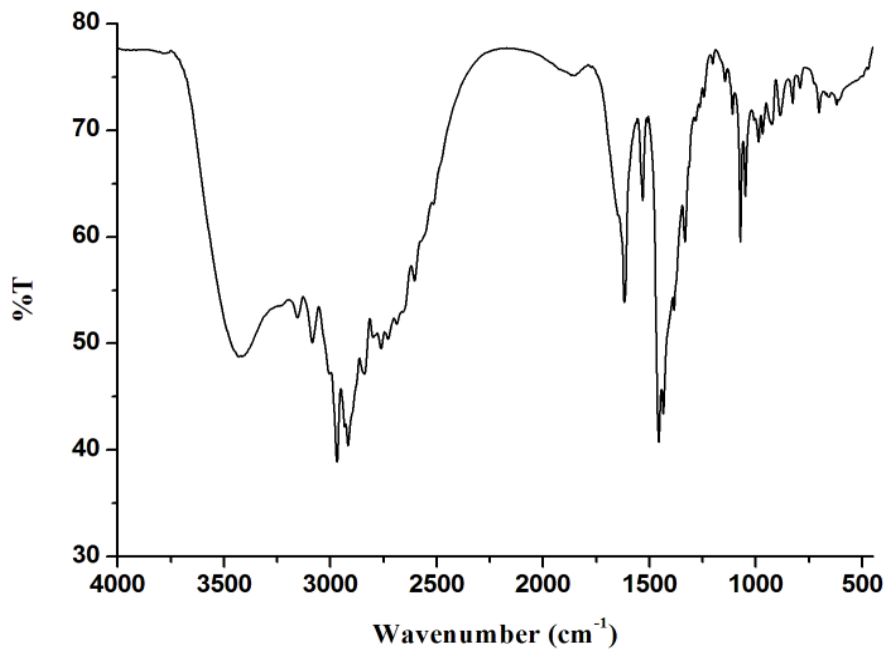

**Figure S3:** FT-IR spectrum of **L** in KBr.

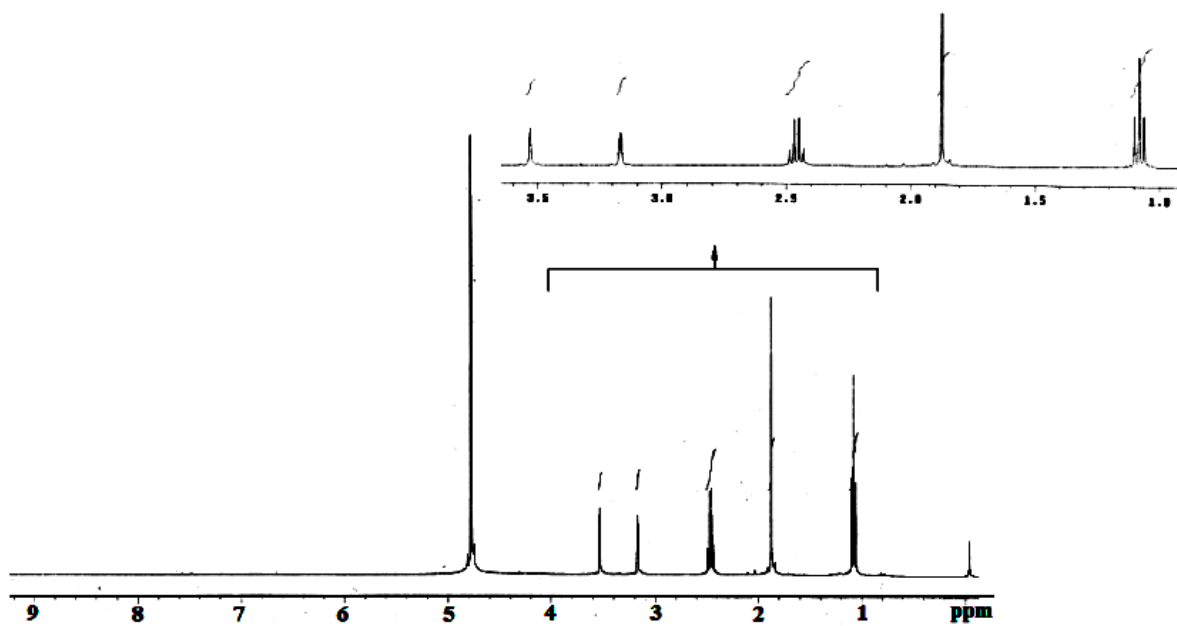

**Figure S4:**  $^1\text{H}$ -NMR spectrum of **L** in methanol- $\text{d}_4$ .

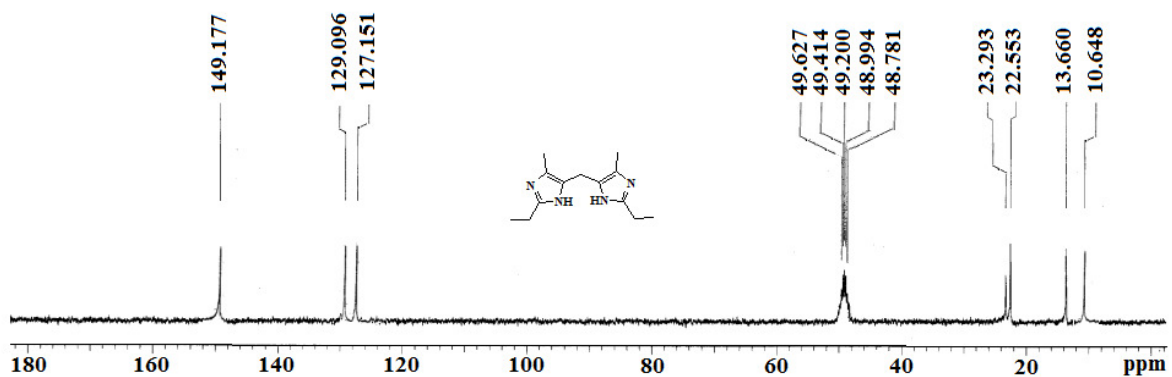

**Figure S5:**  $^{13}\text{C}$ -NMR spectrum of **L** in methanol- $d_4$ .

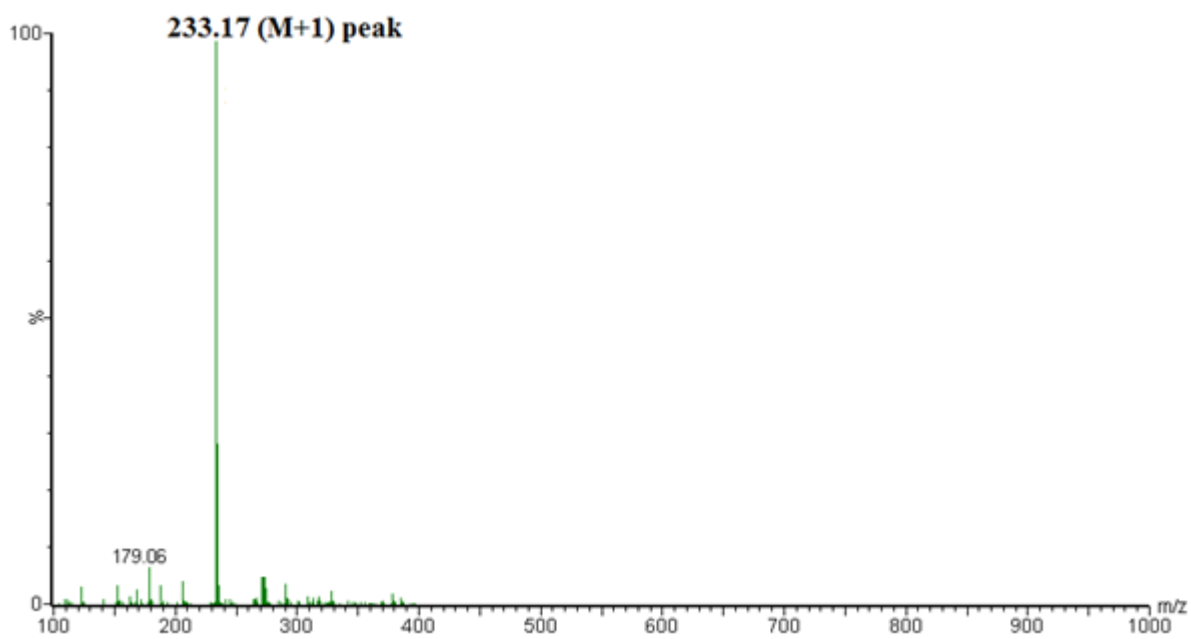

**Figure S6:** ESI-mass spectrum of **L** in methanol.



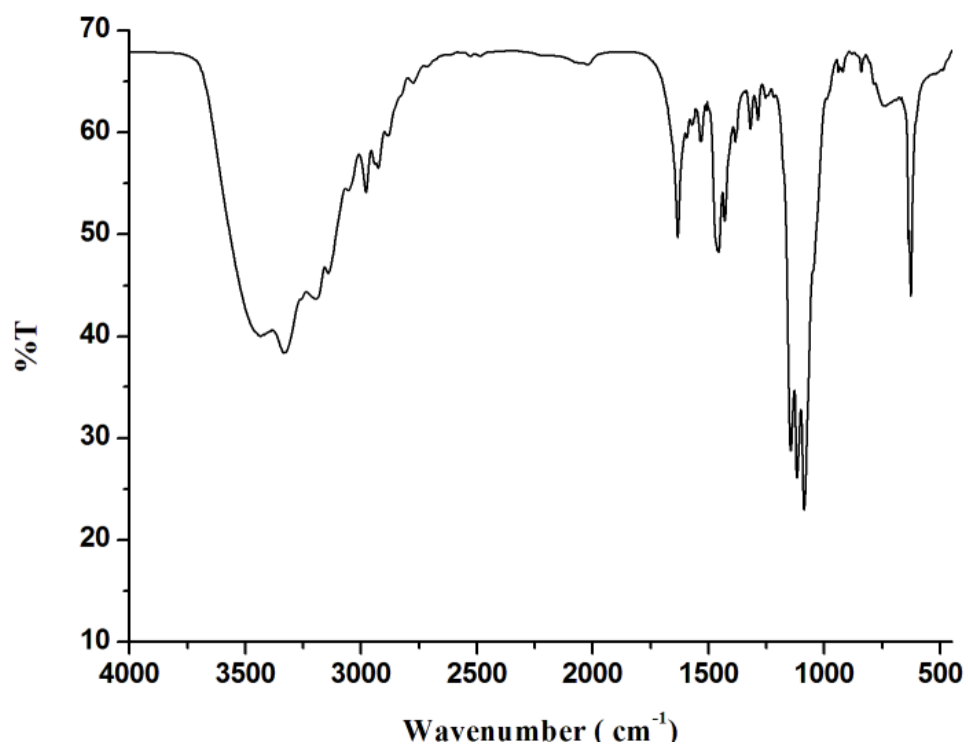

**Figure S7:** FT-IR spectrum of complex **1** in KBr.

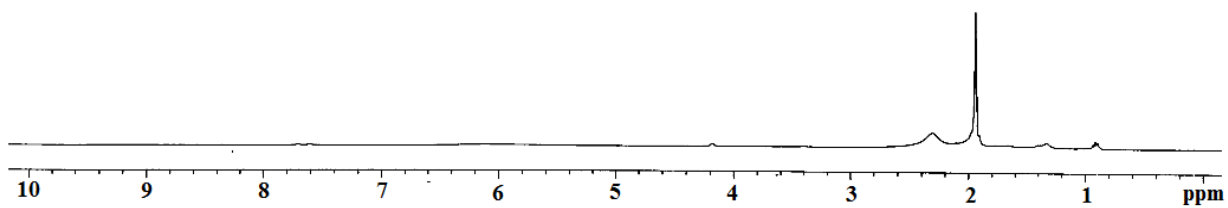

**Figure S8:** <sup>1</sup>H-NMR spectrum of complex **1** in CD<sub>3</sub>CN.

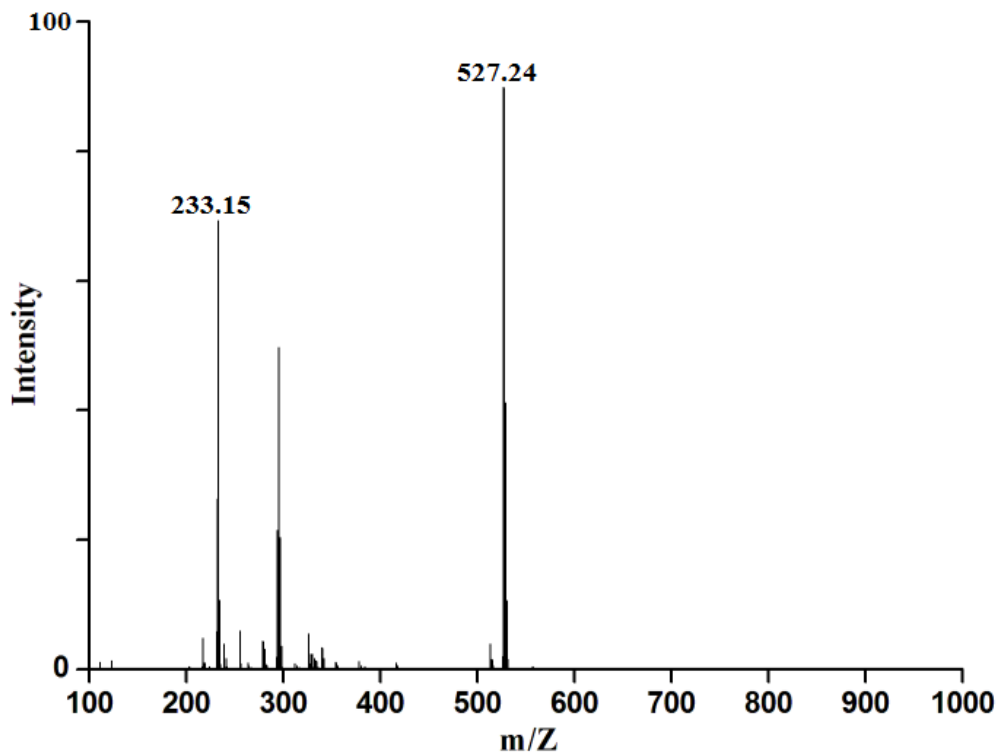

**Figure S9:** ESI-Mass spectrum of complex **1** in methanol.

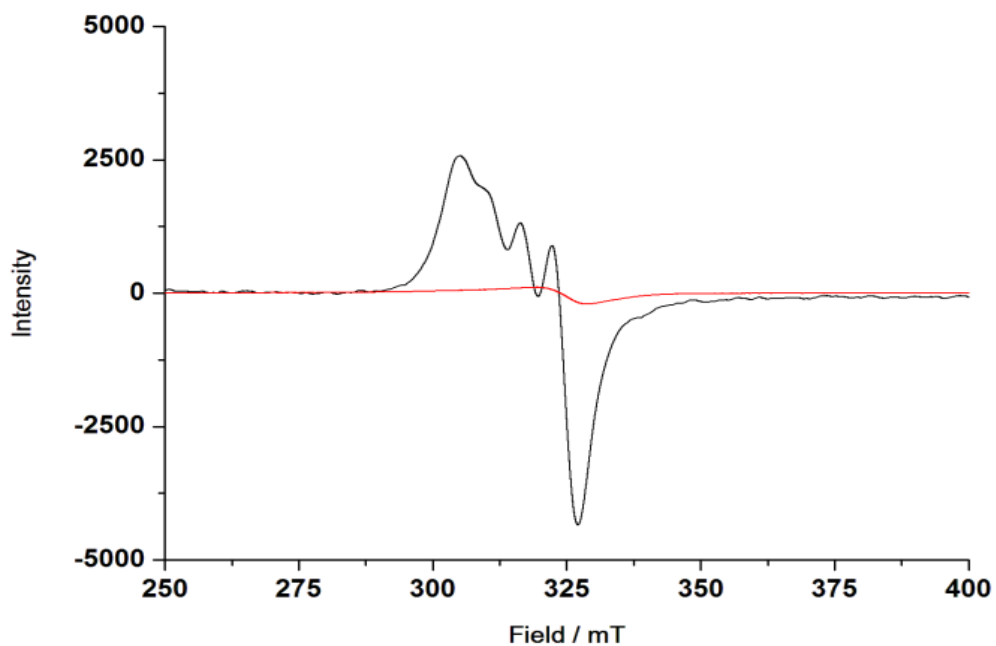

**Figure S10:** X-band EPR spectra of the complexes **1** (black) and **2** (red) in acetonitrile at 77 K.

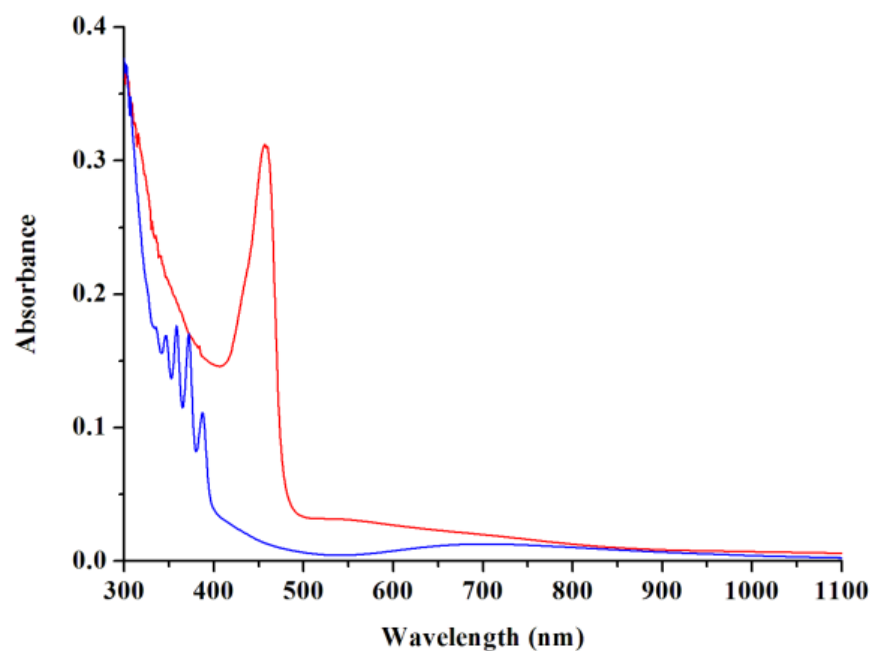

**Figure S11:** UV-visible spectra of complexes **1** (red) and **2** (blue) in acetonitrile solvent at room temperature.

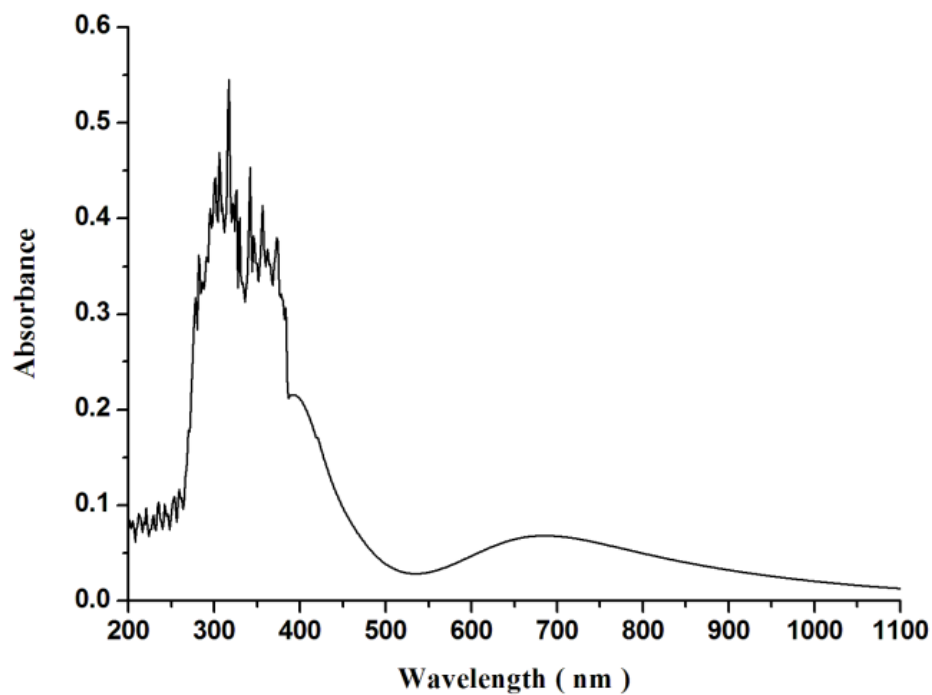

**Figure S12:** UV-visible spectrum of complex **2** in acetonitrile solvent at room temperature.

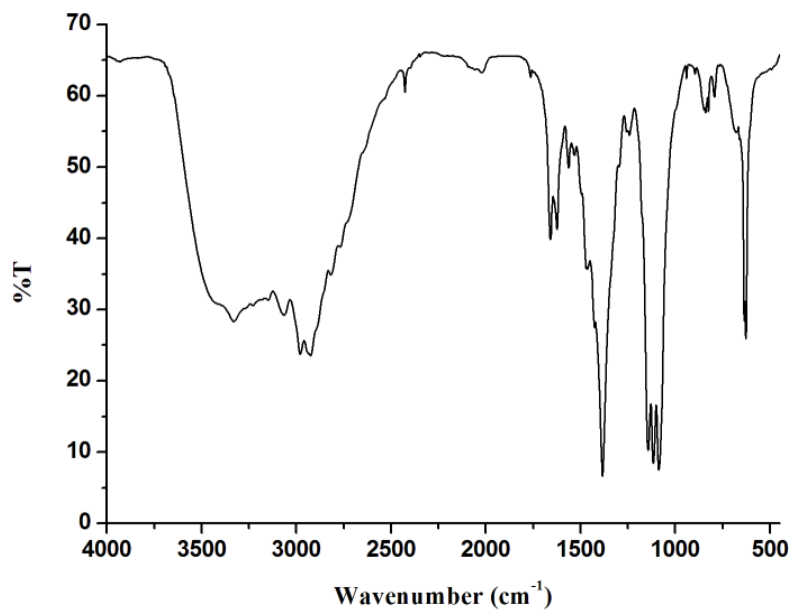

**Figure S13:** FT-IR spectrum of complex **2** in KBr.

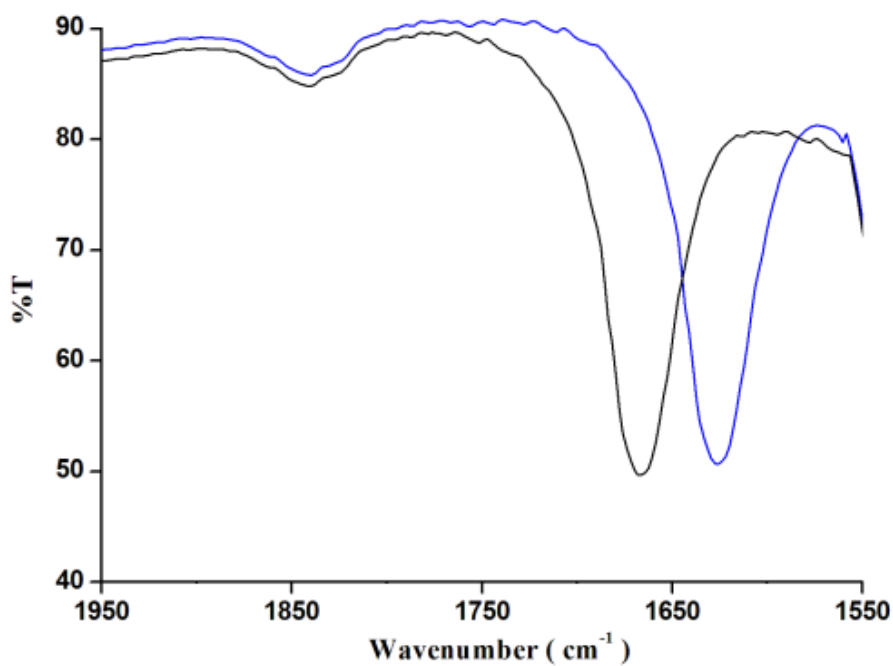

**Figure S14:** FT-IR spectra of complex **2** derived from nitric oxide (black) and  $^{15}\text{NO}$  (blue) in acetonitrile solution. Only  $\nu_{\text{NO}}$  frequency is shown for clarity.

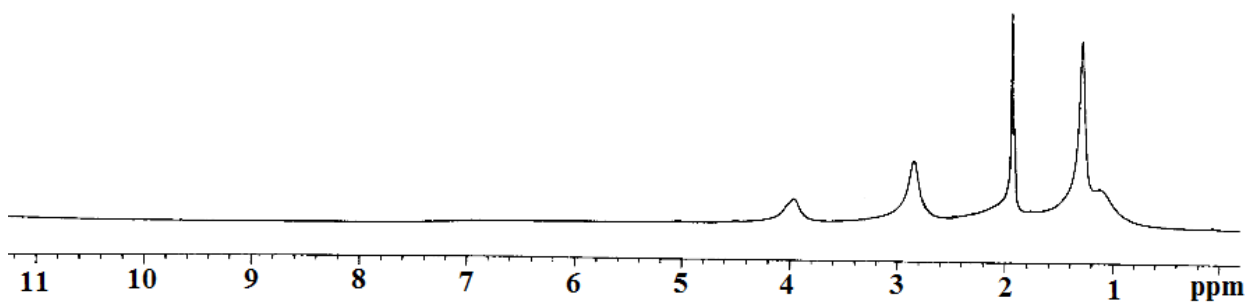

**Figure S15:** <sup>1</sup>H-NMR spectrum of complex **2** in CD<sub>3</sub>CN.

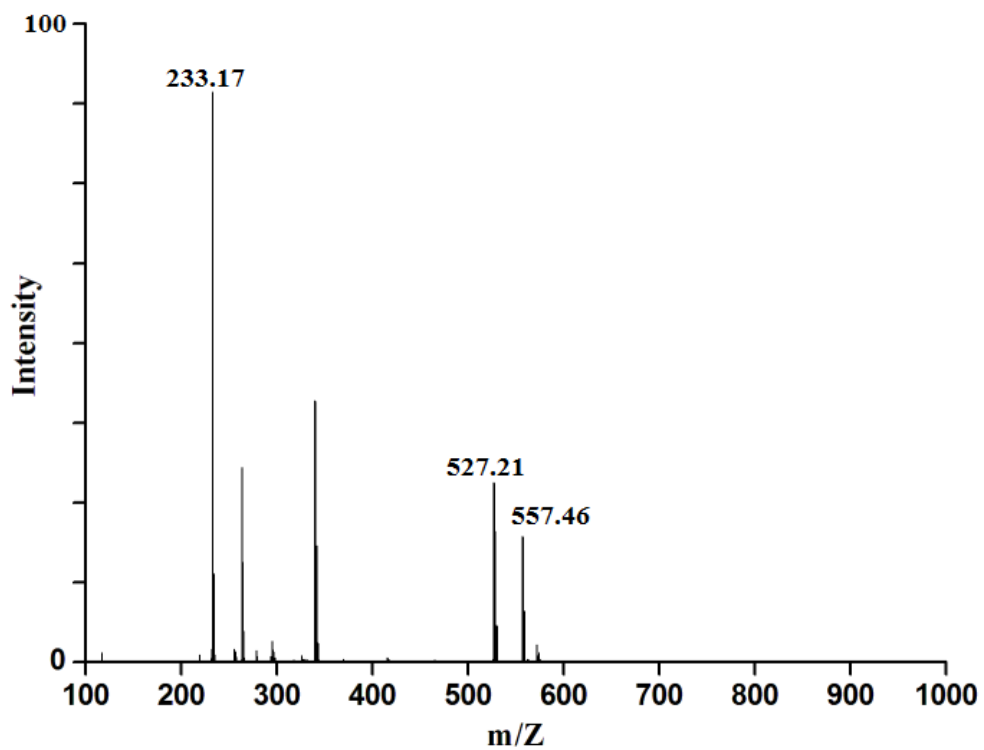

**Figure S16:** ESI-Mass spectrum of complex **2** in acetonitrile.

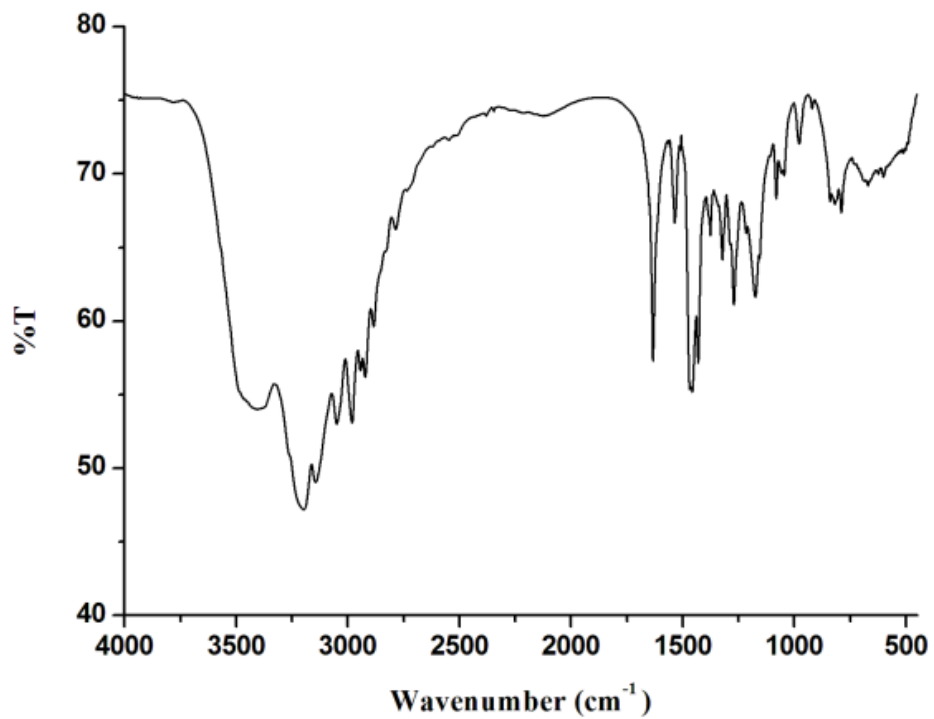

**Figure S17:** FT-IR spectrum of complex **3** in KBr.

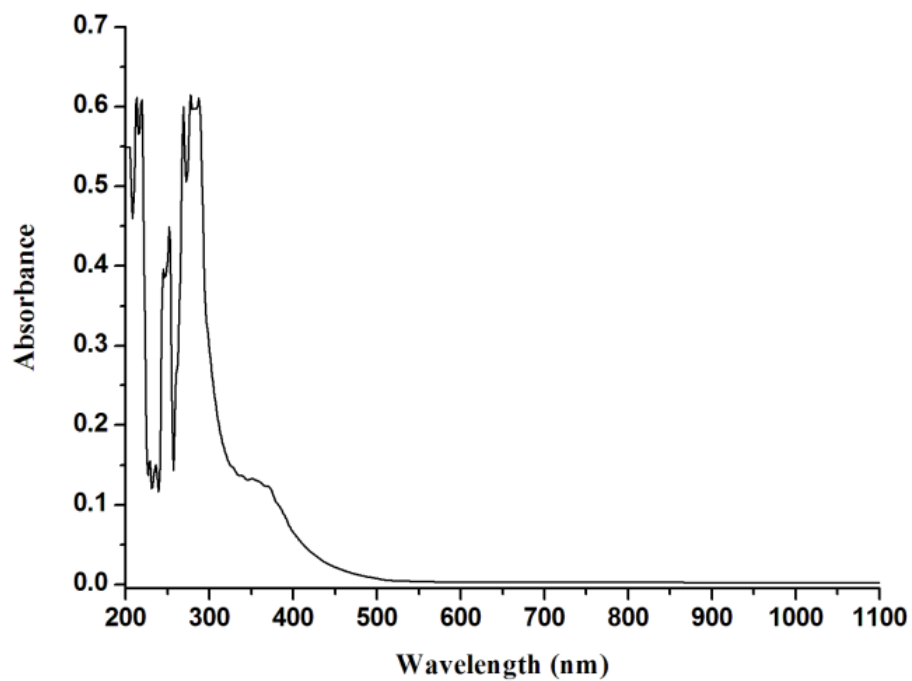

**Figure S18:** UV-visible spectrum of complex **3** in acetonitrile solvent at room temperature.

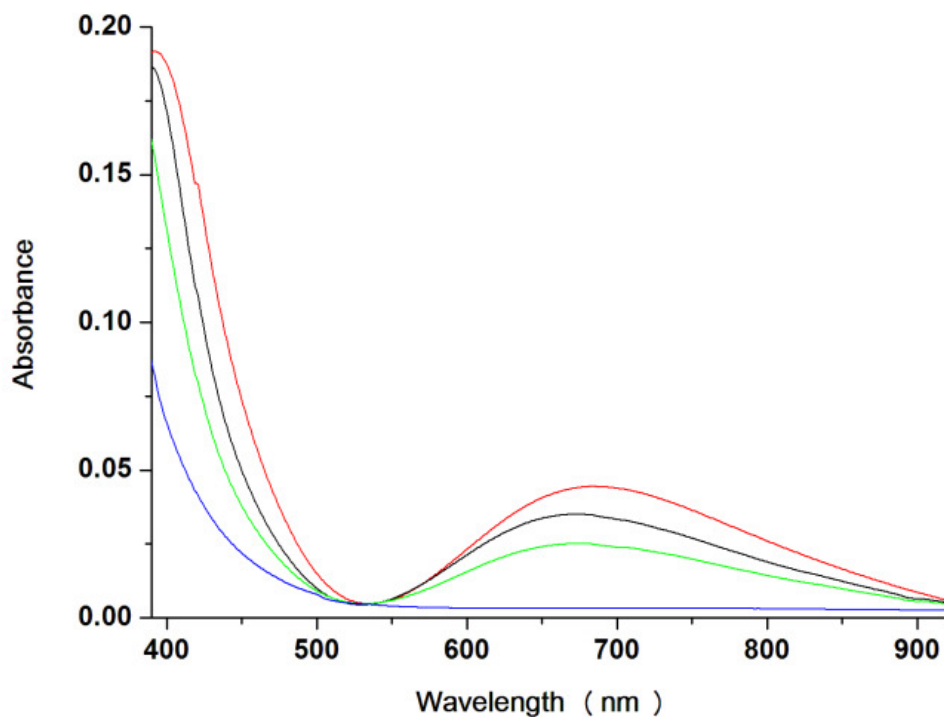

**Figure S19:** (a) UV-visible spectroscopic monitoring of the reaction of complex **2** with water in acetonitrile. Red and blue traces represent complexes **2** and **3**, respectively; whereas, black and green ones represent the intermediate steps for the gradual decomposition of complex **2** to **3**.

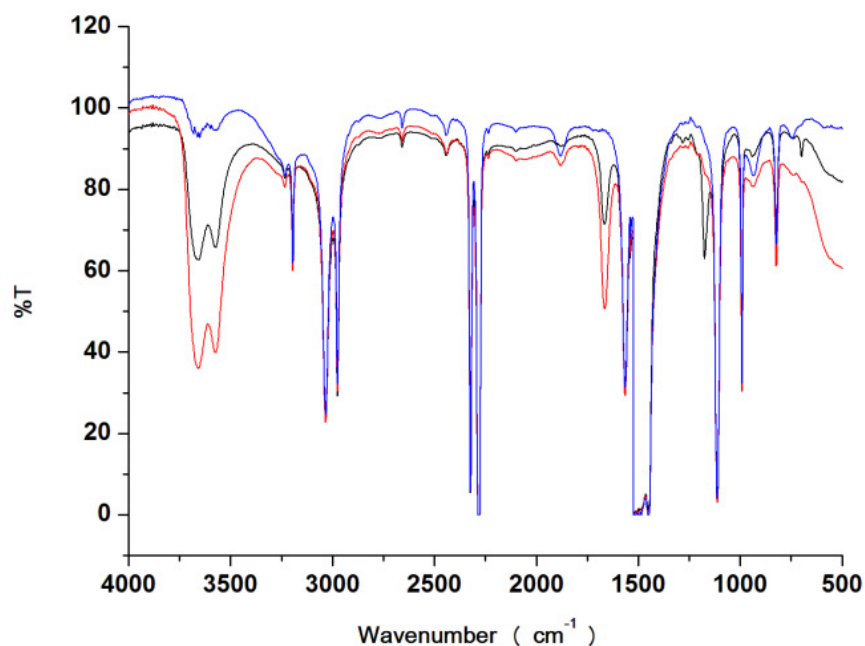

**Figure S20:** Solution FT-IR spectra of complex **2** (red line) and after reaction with water in acetonitrile solvent at room temperature.

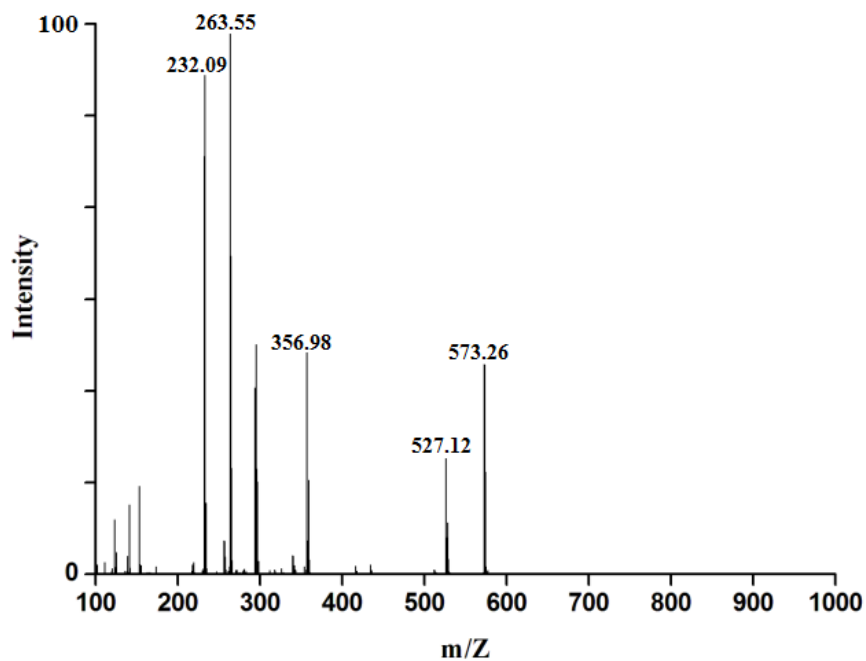

**Figure S21:** ESI-mass spectrum of complex **3** obtained from the reaction of complex **2** and water in acetonitrile.

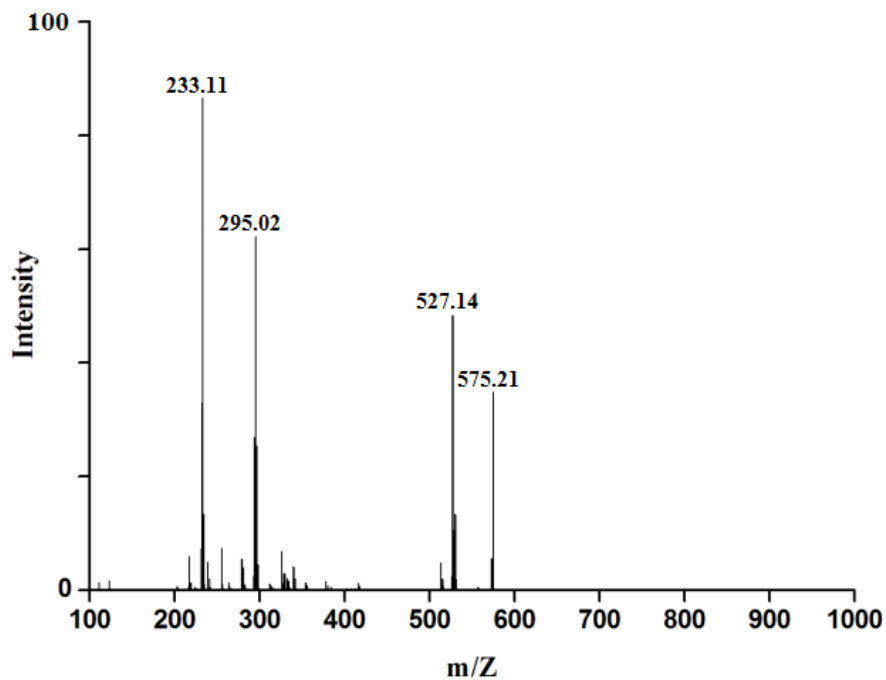

**Figure S22:** ESI-mass spectrum of complex **3** obtained from the reaction of complex **2** and water ( $^{18}\text{O}$ -labeled) in acetonitrile.



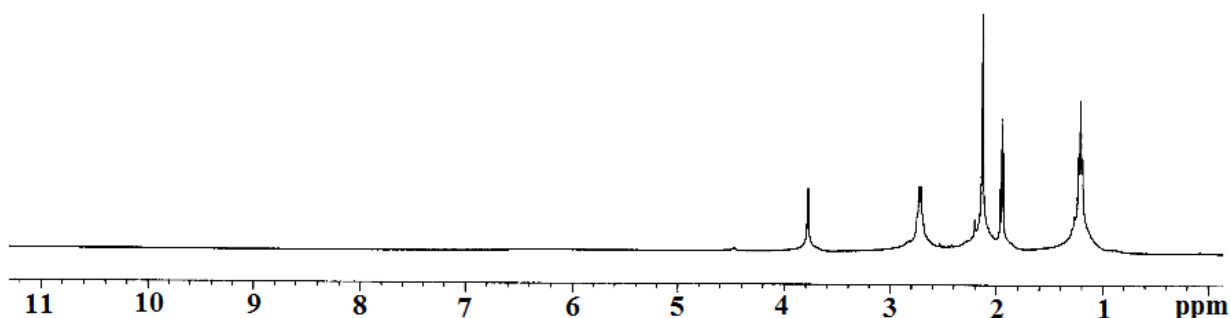

**Figure S23:**  $^1\text{H-NMR}$  spectrum of complex **3** in  $\text{CD}_3\text{CN}$ .

**Table S1.** Crystallographic data for complexes **1** and **3**.

|                                     | <b>Complex1</b>                                                       | <b>Complex 3</b>                                       |
|-------------------------------------|-----------------------------------------------------------------------|--------------------------------------------------------|
| Formulae                            | $\text{C}_{30} \text{H}_{42} \text{Cl}_2 \text{Cu N}_{10} \text{O}_8$ | $\text{C}_{26} \text{H}_{36} \text{Cu N}_9 \text{O}_6$ |
| Mol. wt.                            | 805.19                                                                | 634.19                                                 |
| Crystal system                      | Triclinic                                                             | Monoclinic                                             |
| Space group                         | P -1                                                                  | P 2/c                                                  |
| Temperature /K                      | 296(2)                                                                | 296(2)                                                 |
| Wavelength /Å                       | 0.71073                                                               | 0.71073                                                |
| $a / \text{Å}$                      | 9.3488(6)                                                             | 9.4710(2)                                              |
| $b / \text{Å}$                      | 11.1223(7)                                                            | 9.4545(2)                                              |
| $c / \text{Å}$                      | 18.8929(11)                                                           | 18.3295(5)                                             |
| $\alpha / ^\circ$                   | 77.839(3)                                                             | 90.00                                                  |
| $\beta / ^\circ$                    | 86.532(3)                                                             | 90.0540(10)                                            |
| $\gamma / ^\circ$                   | 82.881(3)                                                             | 90.00                                                  |
| $V / \text{Å}^3$                    | 1904.4(2)                                                             | 1641.29(7)                                             |
| $Z$                                 | 2                                                                     | 2                                                      |
| $D_{\text{calc}} / \text{Mgm}^{-3}$ | 1.404                                                                 | 1.283                                                  |
| $\mu / \text{mm}^{-1}$              | 0.773                                                                 | 0.716                                                  |
| Abs. correction                     | None                                                                  | None                                                   |
| F(000)                              | 838                                                                   | 664.0                                                  |
| Total no. of reflections            | 9262                                                                  | 4113                                                   |
| Reflections, $I > 2\sigma(I)$       | 6429                                                                  | 3330                                                   |
| Max. $2\theta / ^\circ$             | 28.32                                                                 | 28.38                                                  |
| Ranges (h, k, l)                    | -12 ≤ h ≤ 12<br>-14 ≤ k ≤ 14<br>-24 ≤ l ≤ 24                          | -12 ≤ h ≤ 12<br>-12 ≤ k ≤ 12<br>-24 ≤ l ≤ 24           |
| Complete to $2\theta$ (%)           | 97.5                                                                  | 99.8                                                   |
| Refinement method                   | Full-matrix least-squares on $F^2$                                    | Full-matrix least-squares on $F^2$                     |

|                                |        |        |
|--------------------------------|--------|--------|
| Goof ( $F^2$ )                 | 1.039  | 1.100  |
| R indices [ $I > 2\sigma(I)$ ] | 0.0576 | 0.0582 |
| R indices (all data)           | 0.0847 | 0.0674 |

**Table S2.** Selected bond length (Å) for complexes **1** and **3**.

|             | <b>Complex 1</b> | <b>Complex 3</b> |
|-------------|------------------|------------------|
| Cu(1)-N(1)  | 2.035(2)         | 1.984(2)         |
| Cu(1)-N(3)  | 1.995(3)         | 2.148(2)         |
| Cu(1)-O(1)  | -                | 2.353(3)         |
| C(2)-C(1)   | 1.484(7)         | 1.530(5)         |
| C(2)-C(3)   | 1.495(5)         | 1.488(4)         |
| C(3)-N(1)   | 1.328(4)         | 1.329(3)         |
| C(3)-N(2)   | 1.351(4)         | 1.353(4)         |
| C(4)-N(2)   | 1.379(4)         | 1.380(4)         |
| C(6)-N(1)   | 1.397(4)         | 1.401(3)         |
| C(4)-C(5)   | 1.490(4)         | 1.507(5)         |
| C(4)-C(6)   | 1.358(4)         | 1.340(4)         |
| C(7)-C(6)   | 1.489(5)         | 1.486(4)         |
| C(7)-C(8)   | 1.490(5)         | 1.501(4)         |
| N(9)-O(1)   | -                | 1.263(4)         |
| C(9)-C(10)  | 1.493(5)         | 1.482(5)         |
| C(11)-C(12) | 1.489(5)         | 1.500(4)         |
| C(12)-C(13) | 1.49(1)          | 1.514(6)         |

**Table S3.** Selected bond angles (°) for complexes **1** and **3**.

|                  | <b>Complex 1</b> | <b>Complex 3</b> |
|------------------|------------------|------------------|
| N(1)-Cu(1)-N(3)  | 86.7(1)          | 89.15(9)         |
| Cu(1)-N(1)-C(3)  | 133.4(2)         | 129.4(2)         |
| Cu(1)-N(1)-C(6)  | 119.7(2)         | 124.5(2)         |
| Cu(1)-N(3)-C(8)  | 121.0(2)         | 120.0(2)         |
| Cu(1)-N(3)-C(11) | 131.5(2)         | 132.0(2)         |
| N(1)-Cu(1)-O(1)  | -                | 86.30(9)         |
| N(3)-Cu(1)-O(1)  | -                | 158.59(9)        |
| C(1)-C(2)-C(3)   | 114.1(4)         | 113.5(3)         |
| N(2)-C(3)-N(1)   | 109.2(3)         | 110.1(2)         |
| C(3)-N(2)-C(4)   | 109.3(3)         | 107.9(3)         |
| C(3)-N(1)-C(6)   | 106.9(3)         | 106.0(2)         |
| C(5)-C(4)-C(6)   | 132.4(3)         | 132.3(3)         |

|                   |          |          |
|-------------------|----------|----------|
| C(4)-C(6)-C(7)    | 130.8(3) | 130.8(2) |
| C(6)-C(7)-C(8)    | 109.3(3) | 111.9(2) |
| C(8)-C(9)-C(10)   | 132.0(3) | 132.2(3) |
| C(8)-N(3)-C(11)   | 107.0(3) | 106.0(2) |
| C(12)-C(11)-N(3)  | 128.3(3) | 127.4(3) |
| C(11)-C(12)-C(13) | 113.8(4) | 114.6(3) |

**Table S4:** NMR data

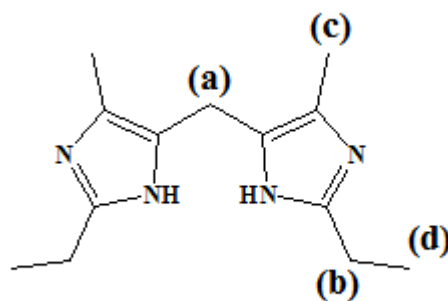

| Chemical Shift ( $\delta_{\text{ppm}}$ ) | Ligand (L) | Complex 2 | Complex 3 |
|------------------------------------------|------------|-----------|-----------|
| (a)                                      | 3.53       | 3.96      | 3.77      |
| (b)                                      | 2.59       | 2.84      | 2.71      |
| (c)                                      | 1.87       | 1.91      | 1.92      |
| (d)                                      | 1.08       | 1.28      | 1.21      |

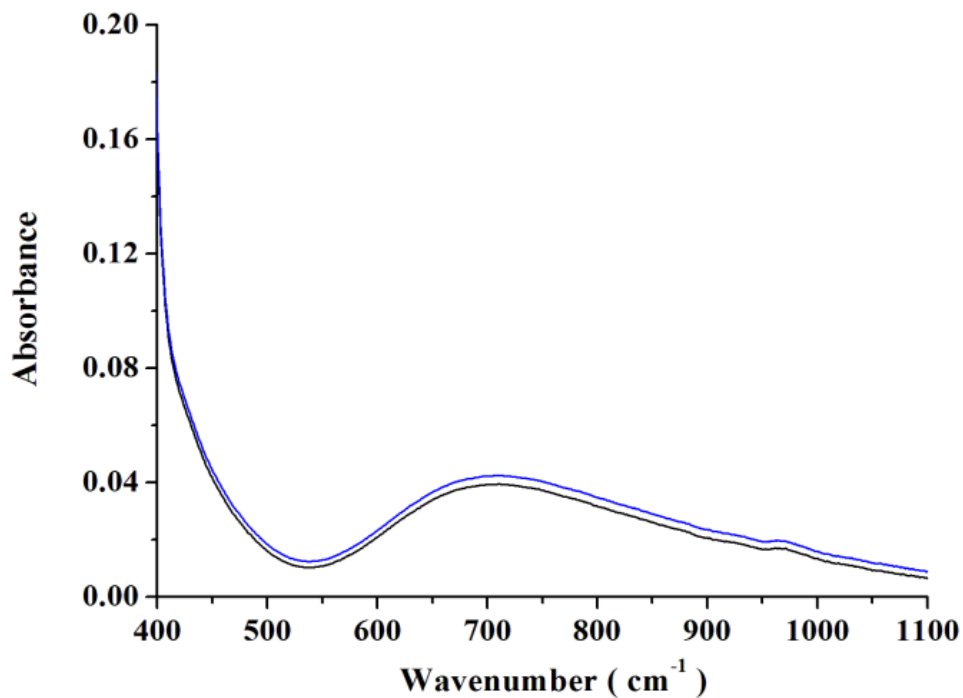

**Figure S24:** UV-visible spectra of complex **2** in degassed acetonitrile solution before (black trace) and after (blue trace) purging O<sub>2</sub> gas.

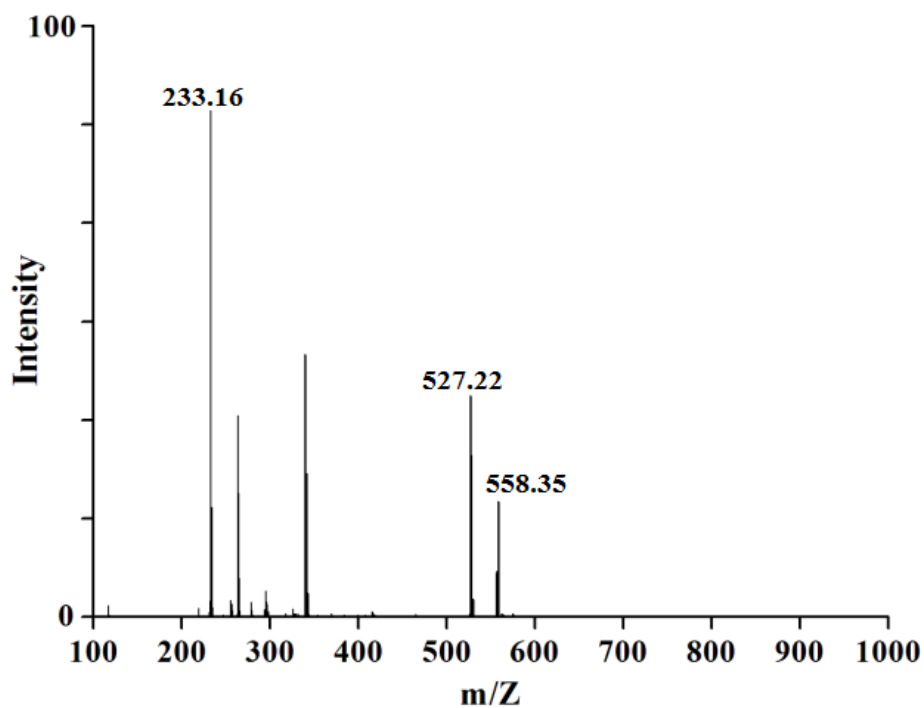

**Figure S25:** ESI-Mass spectrum of <sup>15</sup>NO labeled complex **2** in methanol.

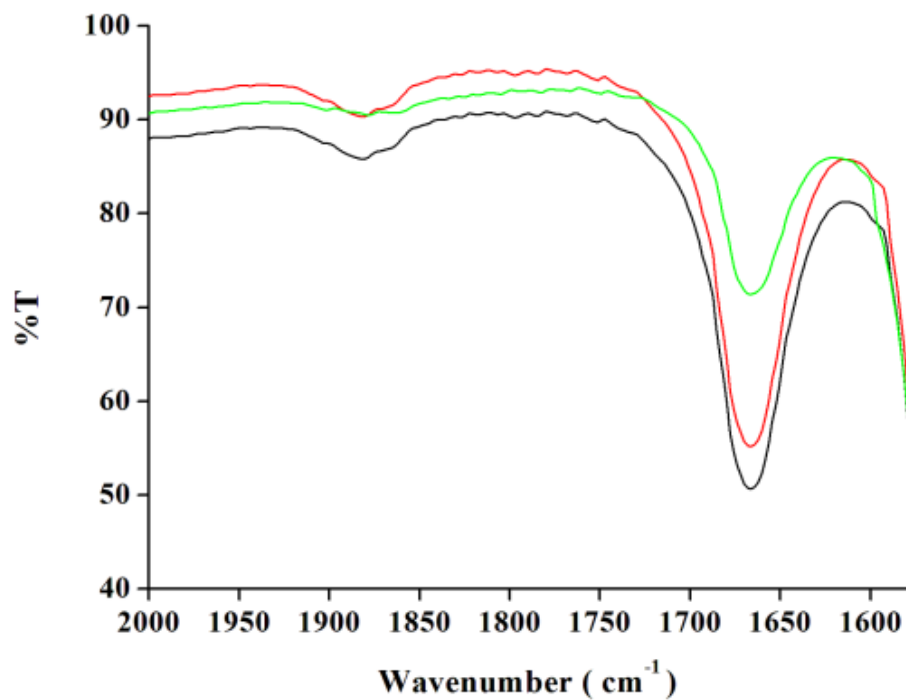

**Figure S26:** FT-IR spectra of complex **2** in acetonitrile solution before (black) and after applying vacuum [ at 5 minutes (red) and 15 minutes (green)].

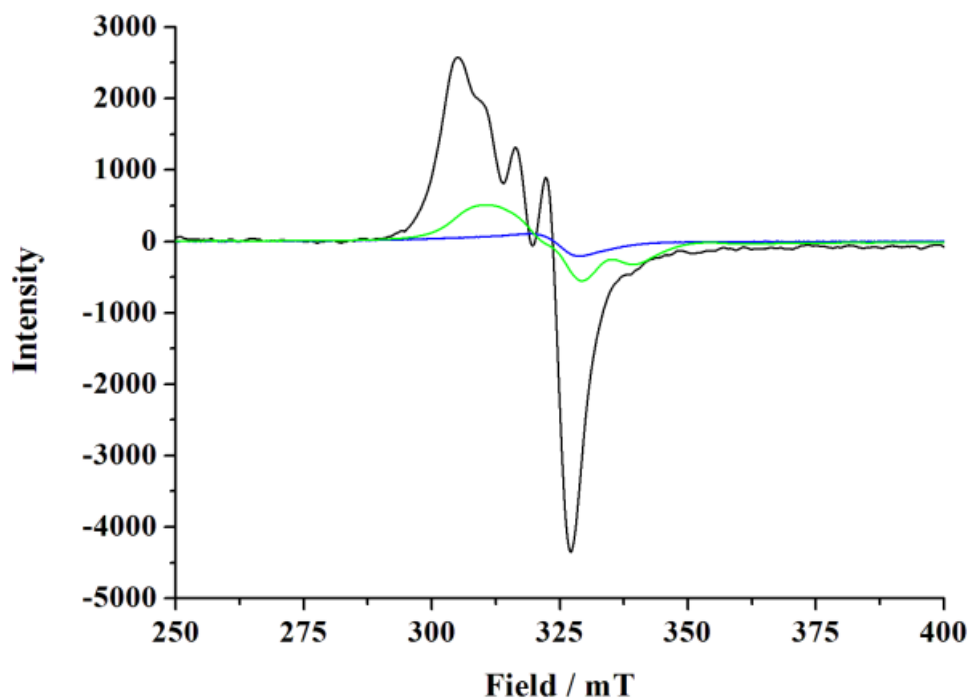

**Figure S27:** X-band EPR spectra of the complex **1** (black trace), complex **2** (blue trace) and after applying vacuum (green trace) upon the solution of complex **2** for 15 minutes in acetonitrile at room temperature.

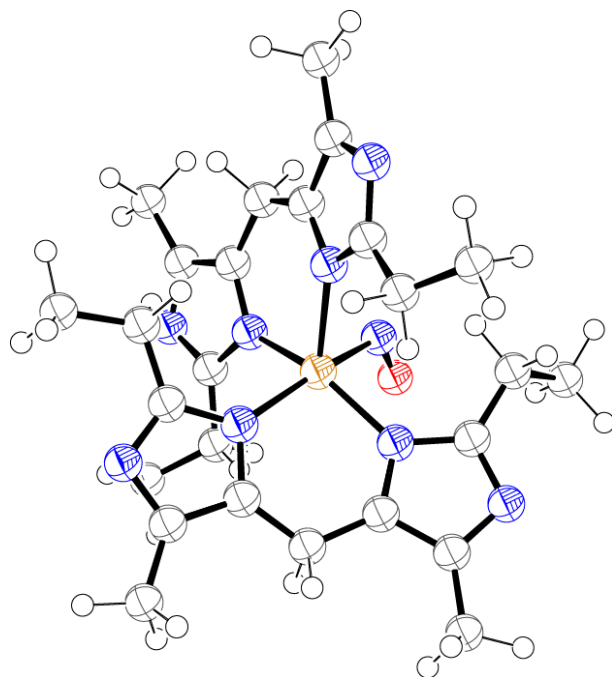

**Figure S28:** DFT optimized structure of complex **2** [Atom scheme: Blue, nitrogen; red, Oxygen; gray, Carbon; yellow, Copper].

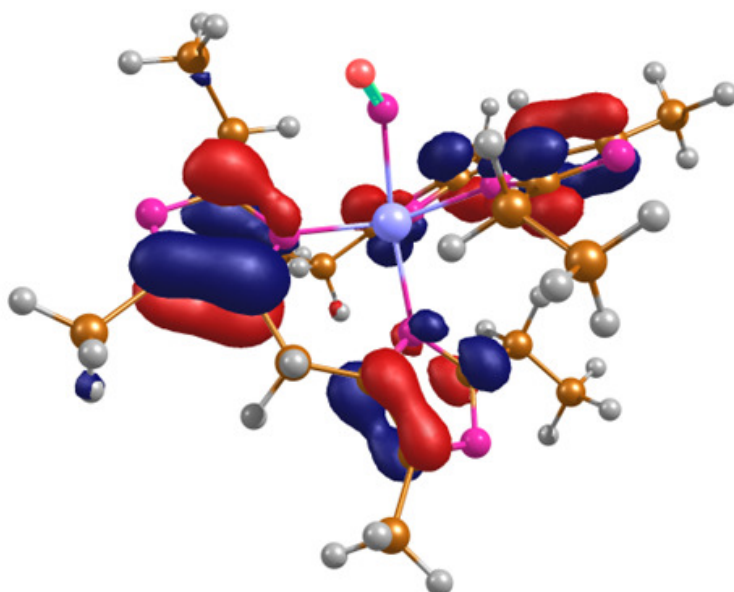

**Figure S29:** HOMO of complex **2**.

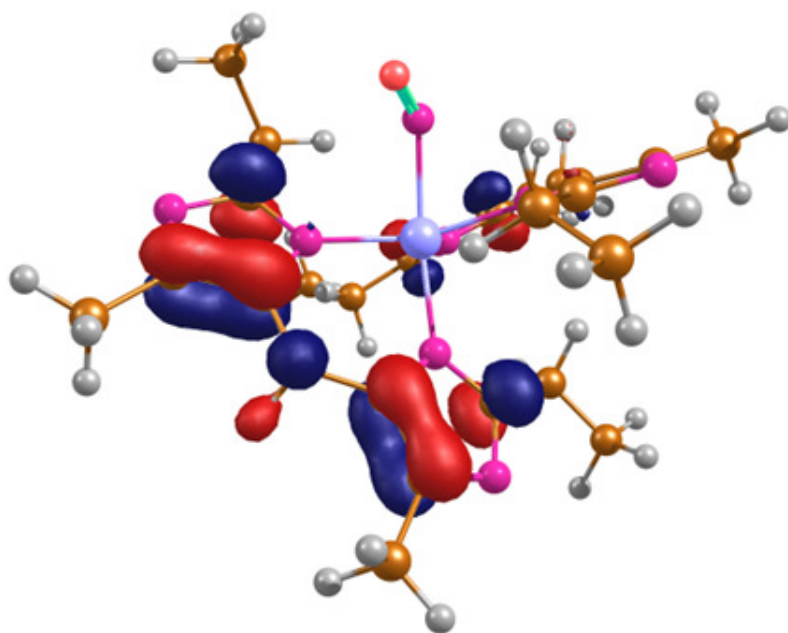

**Figure S30:** LUMO of complex **2**.

**Table S5.** Cartesian coordinates for complex **2**.

|     |              |              |             |
|-----|--------------|--------------|-------------|
| Cu1 | 2.716603511  | 2.876433295  | 4.604014134 |
| N1  | 3.183577821  | 1.323807725  | 3.339529353 |
| N2  | 3.993739068  | -0.676064024 | 2.551807049 |
| N3  | 1.383313896  | 3.606148654  | 3.337232189 |
| N4  | -0.154415958 | 4.927548724  | 2.278593267 |
| N5  | 3.147758964  | 1.902519541  | 6.318285709 |
| N6  | 3.108649884  | 0.362126237  | 7.993790082 |
| N7  | 4.551544026  | 3.999869432  | 4.704374858 |
| N8  | 6.205601167  | 5.568070712  | 4.347110036 |
| C1  | 4.230125943  | 0.399050374  | 3.343703523 |
| C2  | 2.785949867  | -0.468740984 | 2.010410573 |
| C3  | 2.136049059  | -1.377297459 | 1.051627029 |
| H1  | 1.116077603  | -1.633161993 | 1.374207924 |
| H2  | 2.723272122  | -2.291916288 | 0.929472411 |
| H3  | 2.031470402  | -0.889113304 | 0.069360238 |
| C4  | 2.275804526  | 0.812350432  | 2.501320093 |
| C5  | 5.479739375  | 0.610081768  | 4.098347994 |
| H4  | 5.900186302  | 1.577668346  | 3.772113684 |

|     |              |              |              |
|-----|--------------|--------------|--------------|
| H5  | 5.214691403  | 0.782369081  | 5.156059667  |
| C6  | 6.515523334  | -0.501851553 | 3.977186006  |
| H6  | 6.114516519  | -1.456177697 | 4.338795842  |
| H7  | 7.397350959  | -0.245895916 | 4.575699506  |
| H8  | 6.830064770  | -0.636778555 | 2.935693435  |
| C7  | 1.013041370  | 1.442283655  | 2.093019087  |
| H9  | 0.904386722  | 1.319076917  | 1.000793892  |
| H10 | 0.172799423  | 0.819674479  | 2.471087710  |
| C8  | 0.737313273  | 2.845597617  | 2.426838614  |
| C9  | -0.248717680 | 3.688750037  | 1.774650896  |
| C10 | 0.828797386  | 4.874624324  | 3.208251157  |
| C11 | 1.282191402  | 6.068945214  | 3.953203852  |
| H11 | 1.715063063  | 6.766170419  | 3.215147807  |
| H12 | 2.100647630  | 5.812138071  | 4.638744103  |
| C12 | 0.147691160  | 6.804017908  | 4.688237551  |
| H13 | -0.313620060 | 6.166464005  | 5.452599326  |
| H14 | -0.633216480 | 7.109436023  | 3.982763540  |
| H15 | 0.553948944  | 7.698485195  | 5.173277603  |
| C13 | -1.188262268 | 3.298202715  | 0.705619576  |
| H16 | -1.907579834 | 4.101367640  | 0.521439766  |
| H17 | -0.643669174 | 3.095150047  | -0.230588445 |
| H18 | -1.723258972 | 2.373374680  | 0.962808270  |
| C14 | 5.131734821  | 4.904671590  | 3.826383050  |
| C15 | 6.347970139  | 5.088945787  | 5.581945607  |
| C16 | 7.403889958  | 5.499006022  | 6.522439441  |
| H19 | 8.058461616  | 4.646449202  | 6.763205308  |
| H20 | 6.970608528  | 5.831642535  | 7.477184220  |
| H21 | 8.009056378  | 6.302703145  | 6.094285954  |
| C17 | 5.299774414  | 4.073375913  | 5.807746664  |
| C18 | 5.170252737  | 3.261807241  | 7.022824075  |
| H22 | 6.170497181  | 2.856704848  | 7.267627722  |
| H23 | 5.012304189  | 3.960607119  | 7.873008540  |
| C19 | 4.188149919  | 2.172890027  | 7.145420541  |
| C20 | 4.152581373  | 1.188163115  | 8.203489809  |
| C21 | 2.503740254  | 0.805661581  | 6.871150249  |
| C22 | 1.271537335  | 0.226099744  | 6.296340555  |
| H24 | 0.415122794  | 0.684474648  | 6.826959511  |
| H25 | 1.173255498  | 0.553312647  | 5.252681837  |
| C23 | 1.173380796  | -1.298372946 | 6.414636324  |
| H26 | 1.208644817  | -1.613939852 | 7.463154861  |
| H27 | 1.997979627  | -1.785989286 | 5.879284925  |
| H28 | 0.226074354  | -1.636807463 | 5.980311550  |
| C24 | 5.091168383  | 1.055294816  | 9.335452737  |
| H29 | 6.072934872  | 0.701079662  | 8.981808571  |
| H30 | 4.707315544  | 0.336230142  | 10.065613469 |
| H31 | 5.264562073  | 2.022165807  | 9.827350383  |



|     |             |             |             |
|-----|-------------|-------------|-------------|
| C25 | 4.669164108 | 5.063822050 | 2.438409635 |
| H32 | 5.248690216 | 4.330022842 | 1.841533996 |
| H33 | 3.630330224 | 4.717650144 | 2.361223057 |
| C26 | 4.867133335 | 6.455492806 | 1.832574847 |
| H34 | 5.920359544 | 6.755273776 | 1.862469440 |
| H35 | 4.279981381 | 7.205818475 | 2.376506662 |
| H36 | 4.537173084 | 6.446535234 | 0.787585659 |
| N9  | 1.907596660 | 4.000049785 | 6.122397871 |
| O1  | 0.801298487 | 3.877335116 | 6.389540201 |

**Table S6:** Charge partitioning by Hirshfeld method for complex **2**

|    |           |         |
|----|-----------|---------|
| Cu | 1 charge  | 0.3694  |
| N  | 2 charge  | -0.1305 |
| N  | 3 charge  | -0.1782 |
| N  | 4 charge  | -0.1281 |
| N  | 5 charge  | -0.1854 |
| N  | 6 charge  | -0.1242 |
| N  | 7 charge  | -0.1815 |
| N  | 8 charge  | -0.1406 |
| N  | 9 charge  | -0.1810 |
| C  | 10 charge | 0.1435  |
| C  | 11 charge | 0.1024  |
| C  | 12 charge | -0.0822 |
| H  | 13 charge | 0.0769  |
| H  | 14 charge | 0.0673  |
| H  | 15 charge | 0.0799  |
| C  | 16 charge | 0.0851  |
| C  | 17 charge | -0.0461 |
| H  | 18 charge | 0.0640  |
| H  | 19 charge | 0.0454  |
| C  | 20 charge | -0.0983 |
| H  | 21 charge | 0.0429  |
| H  | 22 charge | 0.0528  |
| H  | 23 charge | 0.0435  |
| C  | 24 charge | -0.0287 |
| H  | 25 charge | 0.1002  |
| H  | 26 charge | 0.1120  |
| C  | 27 charge | 0.0840  |
| C  | 28 charge | 0.0938  |
| C  | 29 charge | 0.1285  |
| C  | 30 charge | -0.0511 |
| H  | 31 charge | 0.0754  |
| H  | 32 charge | 0.0357  |
| C  | 33 charge | -0.0915 |

|   |           |         |
|---|-----------|---------|
| H | 34 charge | 0.0383  |
| H | 35 charge | 0.0461  |
| H | 36 charge | 0.0583  |
| C | 37 charge | -0.0846 |
| H | 38 charge | 0.0657  |
| H | 39 charge | 0.0768  |
| H | 40 charge | 0.0735  |
| C | 41 charge | 0.1511  |
| C | 42 charge | 0.1080  |
| C | 43 charge | -0.0818 |
| H | 44 charge | 0.0800  |
| H | 45 charge | 0.0782  |
| H | 46 charge | 0.0676  |
| C | 47 charge | 0.0931  |
| C | 48 charge | -0.0304 |
| H | 49 charge | 0.1030  |
| H | 50 charge | 0.1110  |
| C | 51 charge | 0.0712  |
| C | 52 charge | 0.0898  |
| C | 53 charge | 0.1266  |
| C | 54 charge | -0.0493 |
| H | 55 charge | 0.0734  |
| H | 56 charge | 0.0367  |
| C | 57 charge | -0.0949 |
| H | 58 charge | 0.0426  |
| H | 59 charge | 0.0422  |
| H | 60 charge | 0.0549  |
| C | 61 charge | -0.0856 |
| H | 62 charge | 0.0762  |
| H | 63 charge | 0.0652  |
| H | 64 charge | 0.0724  |
| C | 65 charge | -0.0434 |
| H | 66 charge | 0.0831  |
| H | 67 charge | 0.0424  |
| C | 68 charge | -0.0939 |
| H | 69 charge | 0.0428  |
| H | 70 charge | 0.0453  |
| H | 71 charge | 0.0553  |
| N | 72 charge | 0.1354  |
| O | 73 charge | 0.1036  |

**Table S7:** Mulliken atomic charges

|        | charge |
|--------|--------|
| Cu(1)  | 0.427  |
| N (2)  | -0.402 |
| N ( 3) | -0.327 |
| N ( 4) | -0.440 |
| N ( 5) | -0.327 |
| N ( 6) | -0.439 |
| N ( 7) | -0.327 |
| N ( 8) | -0.422 |
| N ( 9) | -0.326 |
| C (10) | 0.344  |
| C (11) | 0.164  |
| C (12) | -0.340 |
| H (13) | 0.158  |
| H (14) | 0.154  |
| H (15) | 0.163  |
| C (16) | 0.223  |
| C (17) | -0.279 |
| H (18) | 0.179  |
| H (19) | 0.171  |
| C (20) | -0.283 |
| H (21) | 0.121  |
| H (22) | 0.125  |
| H (23) | 0.123  |
| C (24) | -0.320 |
| H (25) | 0.223  |
| H (26) | 0.236  |
| C (27) | 0.248  |
| C (28) | 0.156  |
| C (29) | 0.342  |
| C (30) | -0.323 |
| H (31) | 0.194  |
| H (32) | 0.160  |
| C (33) | -0.268 |
| H (34) | 0.119  |
| H (35) | 0.133  |
| H (36) | 0.131  |
| C (37) | -0.342 |
| H (38) | 0.152  |
| H (39) | 0.161  |
| H (40) | 0.153  |
| C (41) | 0.346  |

C ( 42) 0.171  
C ( 43) -0.338  
H ( 44) 0.162  
H ( 45) 0.159  
H ( 46) 0.154  
C ( 47) 0.225  
C ( 48) -0.319  
H ( 49) 0.226  
H ( 50) 0.241  
C ( 51) 0.206  
C ( 52) 0.158  
C ( 53) 0.354  
C ( 54) -0.287  
H ( 55) 0.182  
H ( 56) 0.147  
C ( 57) -0.280  
H ( 58) 0.128  
H ( 59) 0.115  
H ( 60) 0.127  
C ( 61) -0.340  
H ( 62) 0.160  
H ( 63) 0.151  
H ( 64) 0.151  
C ( 65) -0.286  
H ( 66) 0.190  
H ( 67) 0.165  
C ( 68) -0.284  
H ( 69) 0.130  
H ( 70) 0.119  
H ( 71) 0.127  
N ( 72) 0.171  
O ( 73) 0.076

### Results from NBO Analysis:

The NBO analysis<sup>4</sup> which is given below show that the Cu atom in the complex has the following electronic configuration:

Cu 1 [core]4S( 0.31)3d( 9.37)5S( 0.01)

Although the occupancies of the atomic orbitals are non-integer in the complex, the effective atomic configurations can be related to idealized atomic states. The Cu atom has an electronic configuration, [core] (4s)<sup>0.31</sup>(3d)<sup>9.37</sup>(5s)<sup>0.01</sup> in the complex which is ideally a (3d)<sup>9</sup> configuration representing copper to be at Cu (II) state. The NBO analysis is carried out with the GAUSSIAN 03 program<sup>1</sup> using B3LYP functional and 6-311G(d,p) basis set. The excess electrons shown in the configuration are due to the use of polarized basis set. The results of NBO analysis are given below:

| Atom | No | Natural Electron Configuration             |
|------|----|--------------------------------------------|
| Cu   | 1  | [core]4S( 0.31)3d( 9.37)5S( 0.01)          |
| N    | 2  | [core]2S( 1.39)2p( 4.28)3p( 0.02)          |
| N    | 3  | [core]2S( 1.41)2p( 4.08)3p( 0.01)3d( 0.01) |
| N    | 4  | [core]2S( 1.37)2p( 4.33)3p( 0.02)          |
| N    | 5  | [core]2S( 1.41)2p( 4.08)3p( 0.01)3d( 0.01) |
| N    | 6  | [core]2S( 1.38)2p( 4.30)3p( 0.02)          |
| N    | 7  | [core]2S( 1.41)2p( 4.07)3p( 0.01)3d( 0.01) |
| N    | 8  | [core]2S( 1.40)2p( 4.29)3p( 0.02)3d( 0.01) |
| N    | 9  | [core]2S( 1.41)2p( 4.08)3p( 0.01)3d( 0.01) |
| C    | 10 | [core]2S( 0.83)2p( 2.57)3p( 0.02)3d( 0.01) |
| C    | 11 | [core]2S( 0.87)2p( 2.79)3p( 0.01)3d( 0.01) |
| C    | 12 | [core]2S( 1.09)2p( 3.54)3p( 0.01)          |
| H    | 13 | 1S( 0.76)                                  |
| H    | 14 | 1S( 0.74)                                  |
| H    | 15 | 1S( 0.75)                                  |
| C    | 16 | [core]2S( 0.85)2p( 2.87)3p( 0.02)3d( 0.01) |
| C    | 17 | [core]2S( 1.02)2p( 3.42)3p( 0.01)          |
| H    | 18 | 1S( 0.76)                                  |
| H    | 19 | 1S( 0.76)                                  |
| C    | 20 | [core]2S( 1.09)2p( 3.47)3p( 0.01)          |
| H    | 21 | 1S( 0.78)                                  |
| H    | 22 | 1S( 0.79)                                  |
| H    | 23 | 1S( 0.78)                                  |
| C    | 24 | [core]2S( 1.00)2p( 3.50)3p( 0.01)          |
| H    | 25 | 1S( 0.70)                                  |
| H    | 26 | 1S( 0.68)                                  |
| C    | 27 | [core]2S( 0.84)2p( 2.89)3p( 0.02)3d( 0.01) |
| C    | 28 | [core]2S( 0.86)2p( 2.83)3p( 0.01)3d( 0.01) |
| C    | 29 | [core]2S( 0.82)2p( 2.62)3p( 0.02)3d( 0.01) |
| C    | 30 | [core]2S( 1.02)2p( 3.42)3p( 0.01)          |
| H    | 31 | 1S( 0.74)                                  |
| H    | 32 | 1S( 0.79)                                  |
| C    | 33 | [core]2S( 1.09)2p( 3.45)                   |
| H    | 34 | 1S( 0.80)                                  |
| H    | 35 | 1S( 0.77)                                  |
| H    | 36 | 1S( 0.78)                                  |
| C    | 37 | [core]2S( 1.09)2p( 3.54)3p( 0.01)          |
| H    | 38 | 1S( 0.74)                                  |
| H    | 39 | 1S( 0.76)                                  |
| H    | 40 | 1S( 0.77)                                  |
| C    | 41 | [core]2S( 0.83)2p( 2.55)3p( 0.02)3d( 0.01) |
| C    | 42 | [core]2S( 0.87)2p( 2.79)3p( 0.02)3d( 0.01) |

```
C 43      [core]2S( 1.09)2p( 3.54)3p( 0.01)
H 44          1S( 0.75)
H 45          1S( 0.76)
H 46          1S( 0.74)
C 47      [core]2S( 0.85)2p( 2.85)3p( 0.02)3d( 0.01)
C 48      [core]2S( 1.00)2p( 3.51)3p( 0.01)
H 49          1S( 0.70)
H 50          1S( 0.68)
C 51      [core]2S( 0.84)2p( 2.93)3p( 0.02)3d( 0.01)
C 52      [core]2S( 0.86)2p( 2.83)3p( 0.01)3d( 0.01)
C 53      [core]2S( 0.81)2p( 2.62)3p( 0.02)3d( 0.01)
C 54      [core]2S( 1.02)2p( 3.41)3p( 0.01)
H 55          1S( 0.75)
H 56          1S( 0.80)
C 57      [core]2S( 1.09)2p( 3.46)3p( 0.01)
H 58          1S( 0.77)
H 59          1S( 0.80)
H 60          1S( 0.79)
C 61      [core]2S( 1.09)2p( 3.54)3p( 0.01)
H 62          1S( 0.76)
H 63          1S( 0.74)
H 64          1S( 0.77)
C 65      [core]2S( 1.02)2p( 3.42)3p( 0.01)
H 66          1S( 0.73)
H 67          1S( 0.78)
C 68      [core]2S( 1.09)2p( 3.46)3p( 0.01)
H 69          1S( 0.77)
H 70          1S( 0.80)
H 71          1S( 0.78)
N 72      [core]2S( 1.67)2p( 3.10)3S( 0.02)3p( 0.03)3d( 0.01)
O 73      [core]2S( 1.72)2p( 4.31)3S( 0.01)3p( 0.01)3d( 0.01)
```

### **Reference:**

1. M. Shiri, M. A. Zolfigol, H. G. Kruger, Z. Tanbakouchian, *Chem. Rev.* 2010, **110**, 2250- 2293.
2. J. Andzelm, C. Koelmel, A. Klamt, *J. Chem Phys*, 1995, **103**, 9312–9320
3. B. Delly, *J. Chem. Phys.* 1990, **92**, 508-514.
4. M. J. Frisch, G. W. Trucks, H. B. Schlegel, G. E. Scuseria, M. A. Robb, J. R. Cheeseman, J. A. Montgomery Jr., T. Vreven, K. N. Kudin, J. C. Burant, J. M. Millam, S. S. Iyengar, J. Tomasi, V. Barone, B. Mennucci, M. Cossi, G. Scalmani, N. Rega, G. A. Petersson, H. Nakatsuji, M. Hada, M. Ehara, K. Toyota, R. Fukuda, J. Hasegawa, M. Ishida, T. Nakajima, Y. Honda, O. Kitao, H. Nakai, M. Klene, X. Li, J. E. Knox, H.P. Hratchian, J. B. Cross, V. Bakken, C. Adamo, J. Jaramillo, R. Gomperts, R. E. Stratmann, O. Yazyev, A. J. Austin, R. Cammi, C. Pomelli, J. W. Ochterski, P. Y. Ayala, K. Morokuma, G.A. Voth, P. Salvador, J. J. Dannenberg, V. G. Zakrzewski, S. Dapprich, A. D. Daniels, M. C. Strain, O. Farkas, D. K. Malick, A. D. Rabuck, K. Raghavachari, J. B. Foresman, J. V. Ortiz, Q. Cui, A. G. Baboul, S. Clifford, J. Cioslowski, B. B. Stefanov, G. Liu, A. Liashenko, P. Piskorz, I. Komaromi, R. L. Martin, D. J. Fox, T. Keith, M. A. Al-Laham, C. Y. Peng, A. Nanayakkara, M. Challacombe, P. M. W Gill, B. Johnson, W. Chen, M. W. Wong, C. Gonzalez, J. A. Pople, *Gaussian 03*, revision A.1; Gaussian, Inc.: Pittsburgh PA, 2003.
